# Supplementary material for: Identification of mTOR as a primary resistance factor of the IAP antagonist AT406 in hepatocellular carcinoma cells
Source: PubMed Central journal article supplement (PMC5354745; doi:10.18632/oncotarget.14326), 2016-12-28
Supplement: oncotarget-08-9466-s001.pdf [file oncotarget-08-9466-s001.pdf]

## Identification of mTOR as a primary resistance factor of the IAP antagonist AT406 in hepatocellular carcinoma cells

### Supplementary Materials

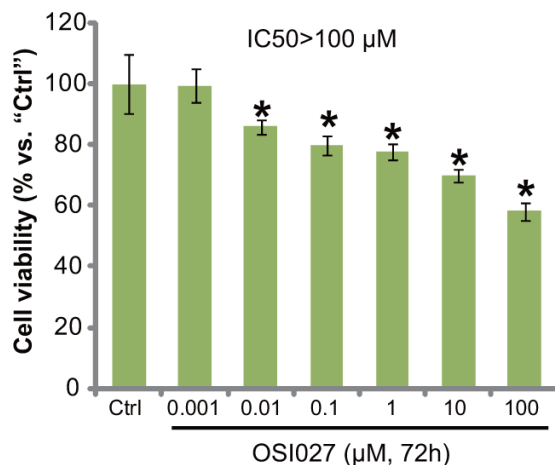

**Supplementary Figure S1: HepG2 cells were treated with indicated concentration of OSI-027, cells were further cultured for 72 hours and subjected to MTT assay.** Data were means of three independent experiments  $\pm$  SD. "Ctrl" indicated untreated control group. \*indicated statistically significant differences as compared to "Ctrl" group. IC-50 was calculated by the GraphPad Prism software using a sigmoidal dose-response curve model.
